# Supplementary material for: A fluorometric and colorimetric dual-signal nanoplatform for ultrasensitive visual monitoring of the activity of alkaline phosphatase
Source: Royal Society of Chemistry journal article supplement (doi:10.1039/d0tb02531c), 2021-01-01
Supplement: d0tb02531c1.pdf [file d0tb02531c1.pdf]

# Supporting

## **Fluorometric and Colorimetric dual-signal nanoplatform for ultrasensitive visual monitoring the activity of alkaline phosphatase**

Jia An<sup>a, b</sup>, Yongqin Hu<sup>a, b</sup>, Guoyi Liu<sup>a, b</sup>, Meizhu Chen<sup>a</sup>, Rubing Chen<sup>a</sup>, Ying Lyu<sup>a</sup>,

Mengdi Yuan<sup>a</sup>, Mengfei Luo<sup>a</sup>, and Yufei Liu<sup>a, b, \*</sup>

<sup>a</sup> Key Laboratory of Optoelectronic Technology & Systems (Chongqing University),

Ministry of Education, Chongqing 400044, China

<sup>b</sup> Collaborative Innovation Center for Brain Science, Chongqing University,

Chongqing 400044, China

\*To whom correspondence should be addressed

Key Laboratory of Optoelectronic Technology & Systems (Chongqing University),

Ministry of Education, Chongqing 400044, China

Tel: +86 13522636676

E-mail address: Yufei.Liu@cqu.edu.cn

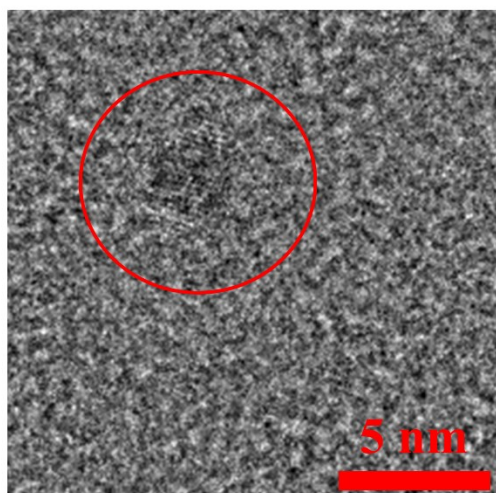

Fig. S1 The high resolution TEM images of the CNPs.

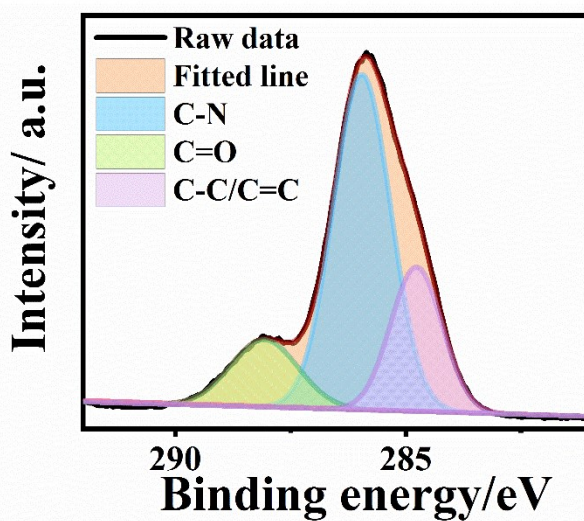

Fig. S2 XPS C 1s spectrum and the deconvoluted results of CNPs.

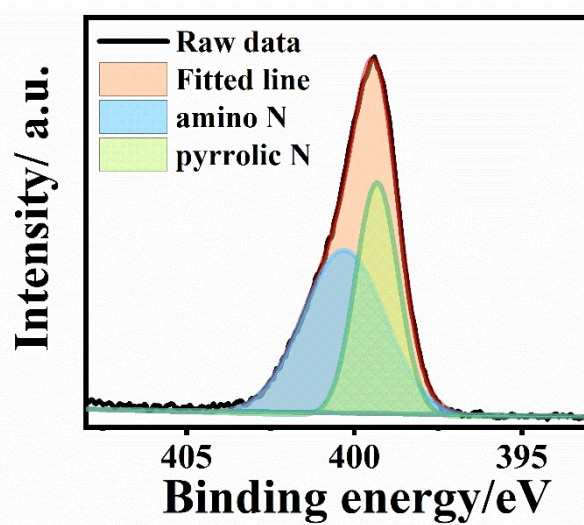

Fig. S3 XPS N 1s spectrum and the deconvoluted results of CNPs.

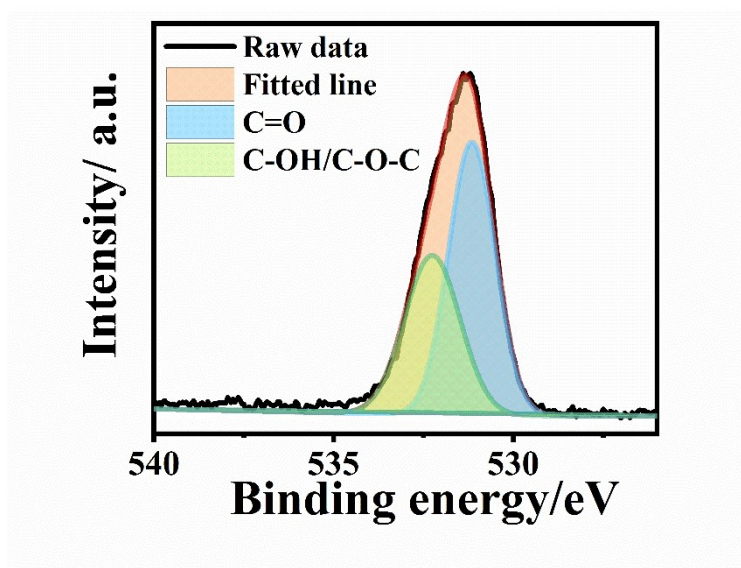

Fig. S4 XPS O 1s spectrum and the deconvoluted results of CNPs.

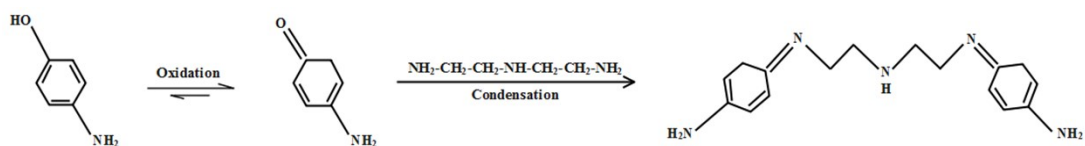

Fig. S5 Possible structural evaluation and fluorescence response mechanism.

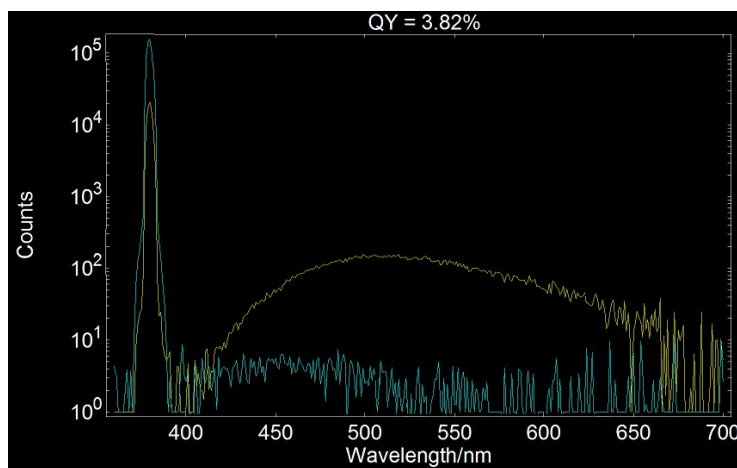

Fig. S6 The original data of absolute quantum yield (QY) of CNPs.

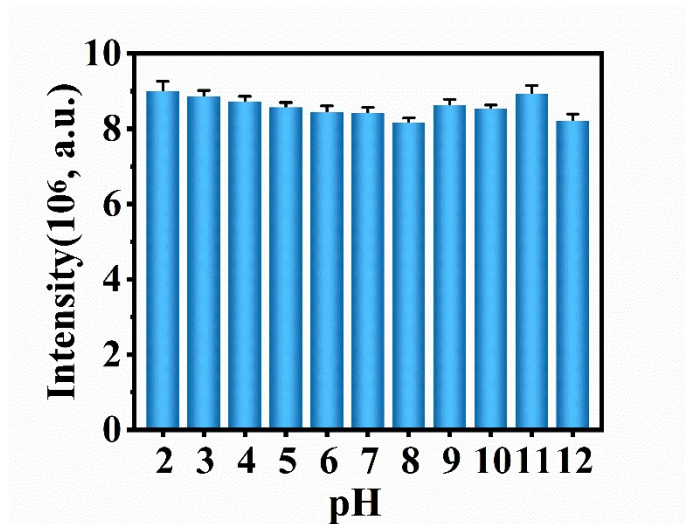

Fig. S7 The pH stability of CNPs.

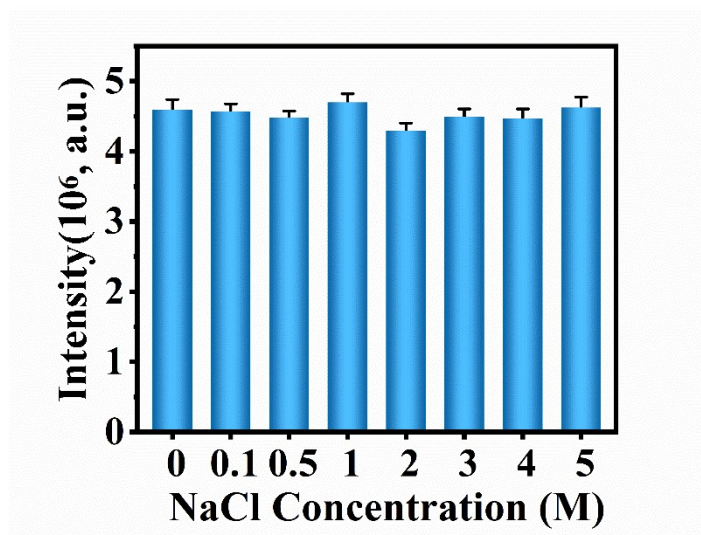

Fig. S8 The ionic concentration stability of CNPs.

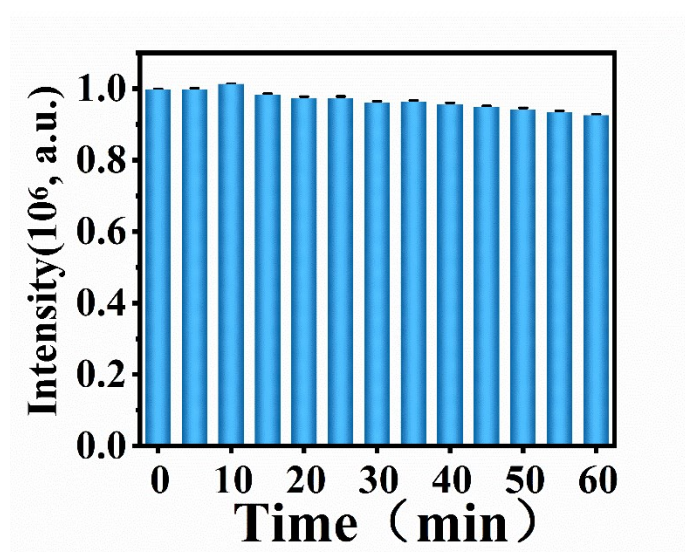

Fig. S9 The UV-illuminating stability of CNPs.

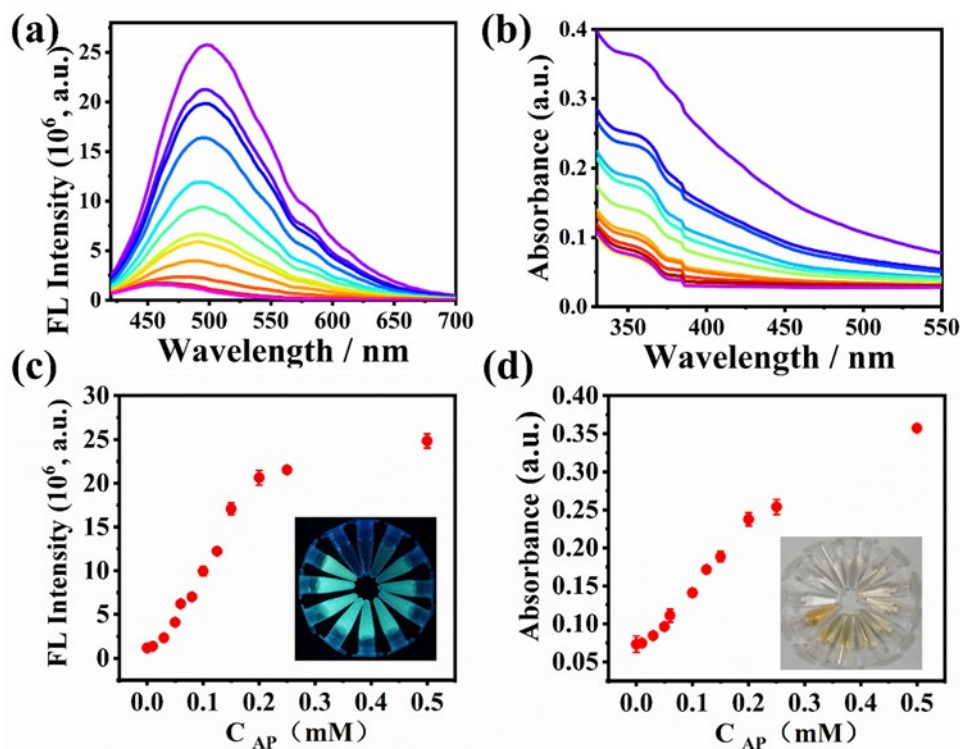

Fig.S10 a) The fluorescence spectrum and b) UV-vis absorbance spectrum of CNPs with different concentrations of AP; The linear relationship between c) fluorescence intensity and d) UV-vis absorbance intensity toward different concentrations of AP.

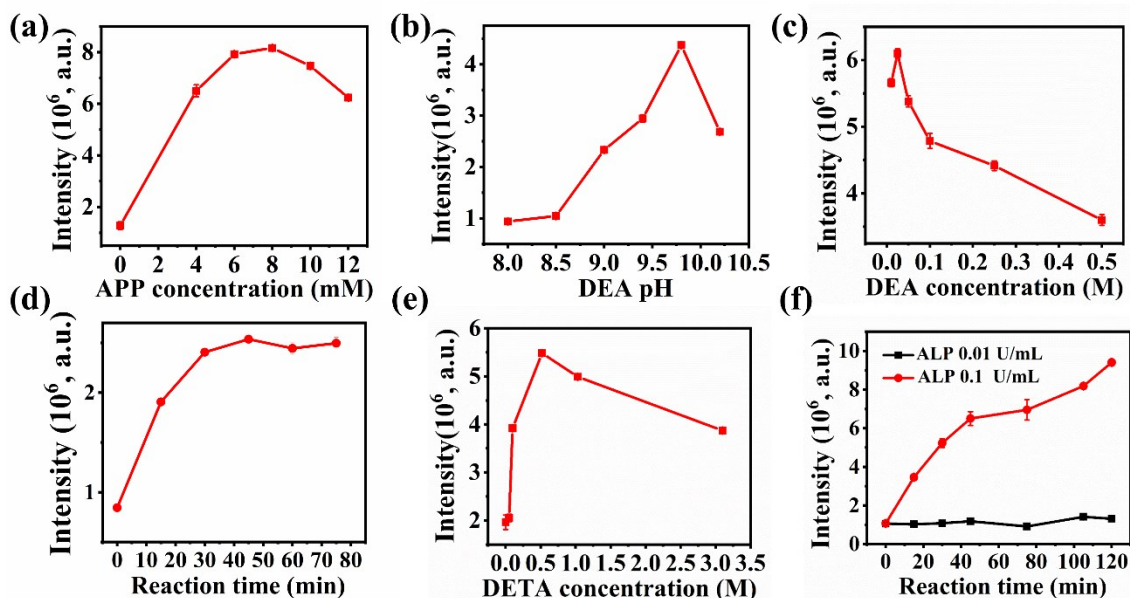

Fig. S11 The fluorescence change towards different a) APP concentration, b) DEA buffer solution pH, c) DEA concentration, d) ALP catalytic reaction time, e) DETA concentration and f) DETA incubation time.

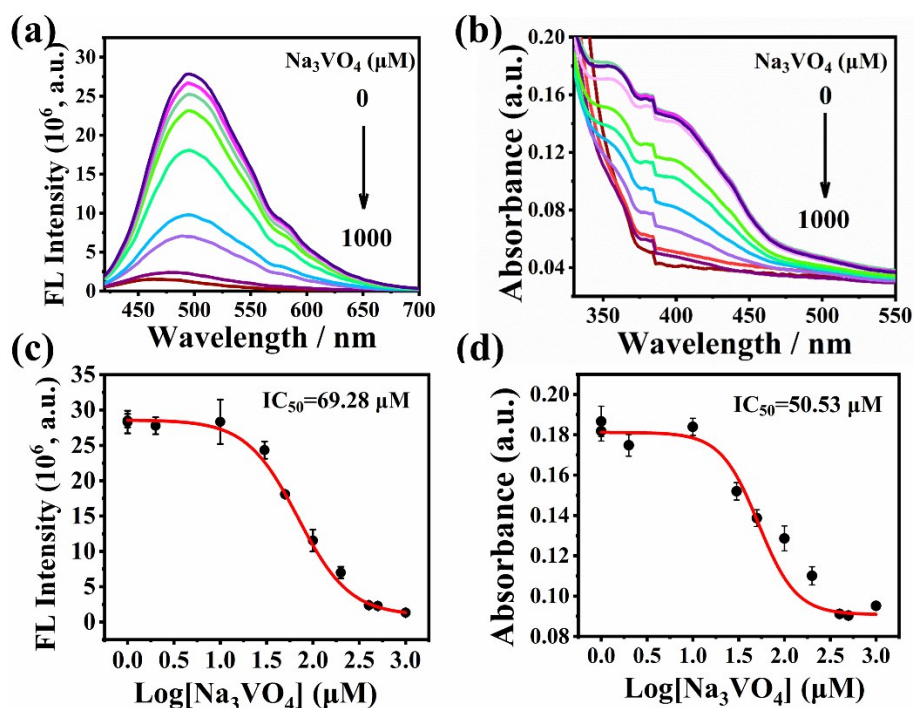

Fig.S12 a) The fluorescence spectrum and b) UV-vis absorbance spectrum of CNPs with different concentrations of  $\text{Na}_3\text{VO}_4$ ; c) fluorescence intensity and d) UV-vis absorbance intensity toward different logarithm of  $\text{Na}_3\text{VO}_4$  concentrations.

Table.S1 Comparison of previously reported methods for detection of ALP activity.

| Method        | Materials                                      | Linear range | Detection limit | References |
|---------------|------------------------------------------------|--------------|-----------------|------------|
|               | EuAMP infinite                                 |              |                 |            |
| Fluorescence  | coordination<br>polymer (ICP)<br>nanoparticles | 1-150 mU     | 0.35 mU         | 1          |
| Fluorescence  | silicon-containing<br>polymer dots             | 0.7-50 mU    | 0.1 mU          | 2          |
| Fluorescence  | Silicon<br>Nanoparticles                       | 0.2-30 mU    | 0.2 mU          | 3          |
| Fluorescence  | Cu nanoclusters                                | 1-50 mU      | 0.27 mU         | 4          |
| photoacoustic | AgNPs                                          | 5-70 mU      | 1.1 mU          | 5          |
| Fluorescence  | CNPs                                           | 0-24 mU      | 0.05 mU         | This work  |
| Colorimetric  | CNPs                                           | 0-30 mU      | 0.05 mU         | This work  |

## References:

1. X. You, C. Huang, Y. Luo, G. Shi, T. Zhou and J. Deng, *Mikrochim. Acta*, 2020, **187**, 354.
2. G. Liu, J. Zhao, M. Yan, S. Zhu, W. Dou, J. Sun and X. Yang, *Science China Chemistry*, 2020, **63**, 554-560.
3. J. Sun, T. Hu, C. Chen, D. Zhao, F. Yang and X. Yang, *Anal. Chem.*, 2016, **88**, 9789-9795.
4. Y. Zhang, Y. Li, C. Zhang, Q. Zhang, X. Huang, M. Yang, S. A. Shahzad, K. K. Lo, C. Yu and S. Jiang, *Analytical and bioanalytical chemistry*, 2017, **409**, 4771-4778.
5. Y. J. Zhang, L. Guo, S. Chen, Y. L. Yu and J. H. Wang, *Anal. Chim. Acta*, 2020, **1108**, 54-60.
